# Supplementary material for: More than noise: Context-dependant luminance contrast discrimination in a coral reef fish ( Rhinecanthus aculeatus )
Source: Oxford University Press journal article supplement (doi:10.1242/jeb.232090), 2020-01-01
Supplement: jeb232090supp.pdf [file jeb232090supp.pdf]

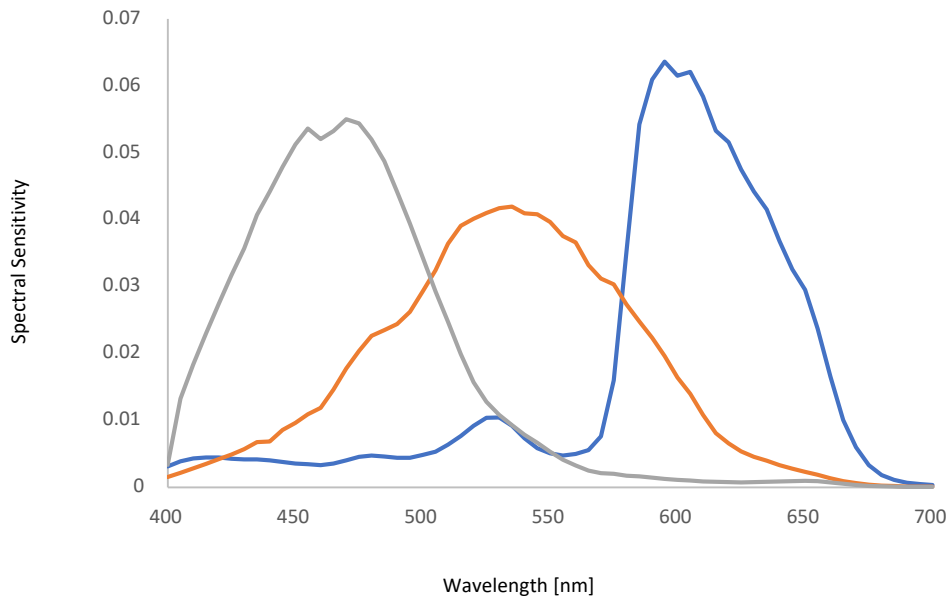

**Figure S1. Spectral sensitivity of the camera and lens used in this study (Olympus PEN-EPL5 + 60mm macro lens).** Data normalised so that the sum under all curves equals 1.

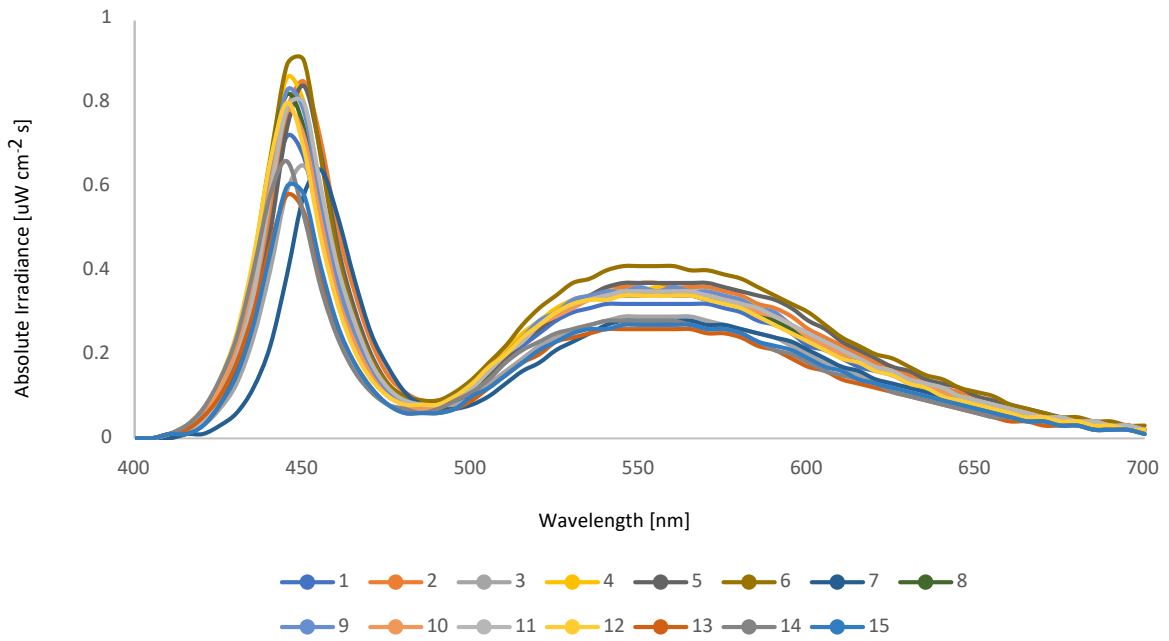

**Figure S2. Absolute irradiance measurements of experimental lighting in all 15 tanks used in the study.**

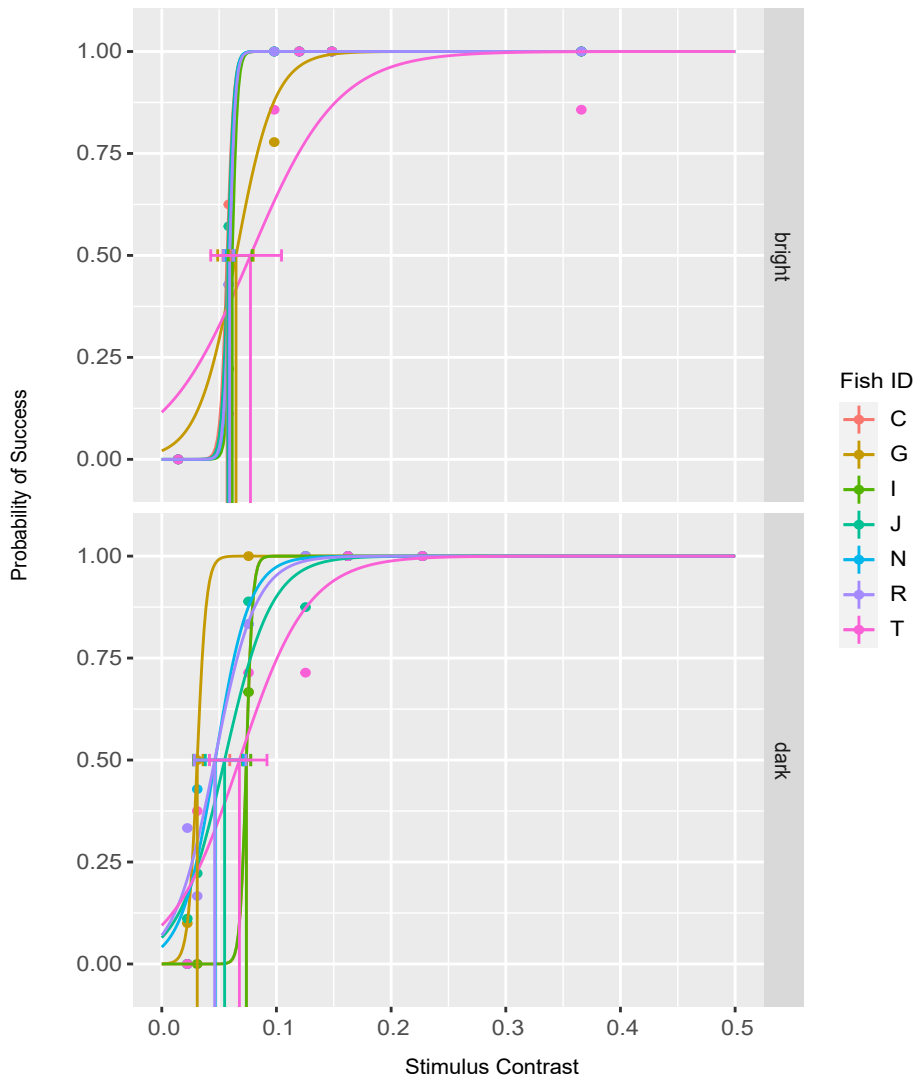

**Figure S3. Detection thresholds for individual fish of group 1 (dark background).** Individually estimated discrimination thresholds in Michelson contrast for each scenario. Error bars represent the 95% confidence intervals.

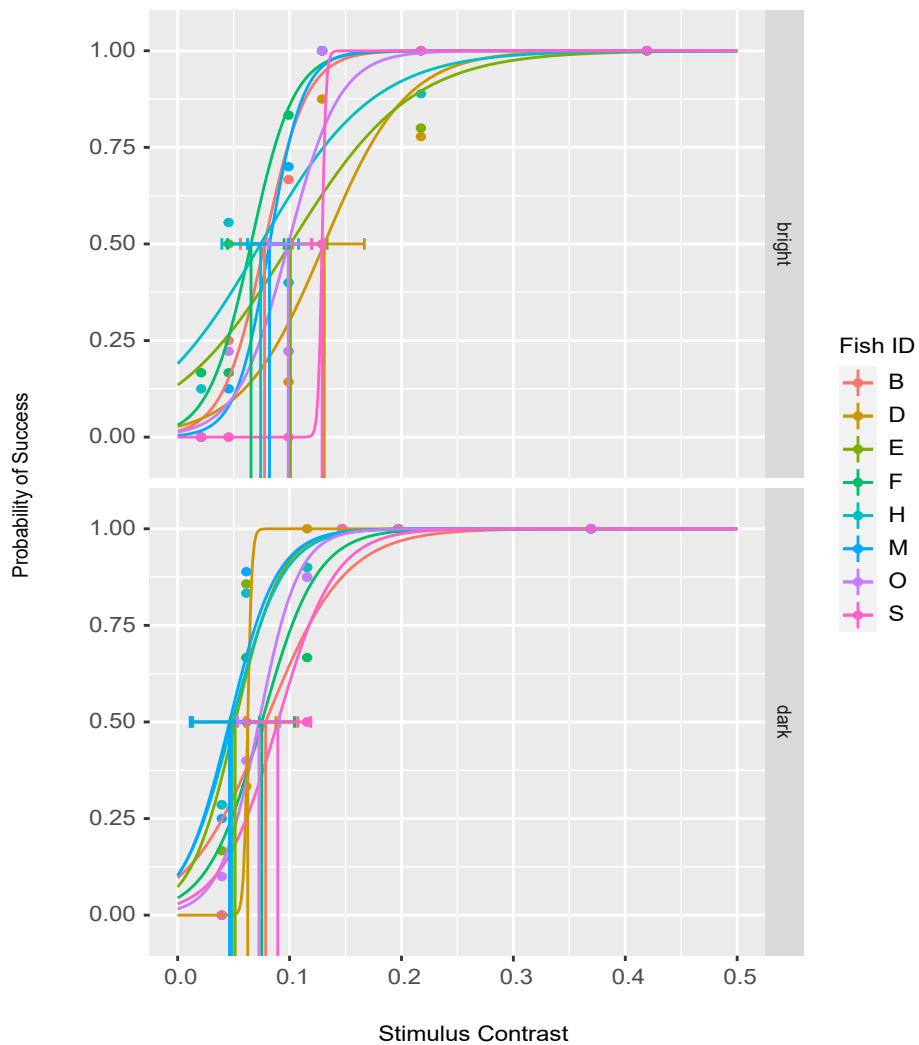

**Figure S4. Detection thresholds for individual fish of group 2 (bright background).** Individually estimated discrimination thresholds in Michelson contrast for each scenario. Error bars represent the 95% confidence intervals.
